# Supplementary material for: TEAD1 and c-Cbl are novel prostate basal cell markers that correlate with poor clinical outcome in prostate cancer
Source: PubMed Central journal article supplement (PMC2600693; doi:10.1038/sj.bjc.6604774), 2008-11-11
Supplement: 6604774x1.pdf [file 6604774x1.pdf]

## Online only

### Supplementary Table 1 – antibodies used in this study

#### Primary antibodies

| Antigen/clone      | Species/Isotype        | Source                                          | Dilution         |
|--------------------|------------------------|-------------------------------------------------|------------------|
| CBL                | Rabbit IgG             | Abcam plc, Cambridge, UK                        | 1:500            |
| IL6 / BE8          | Mouse IgG <sub>1</sub> | Abcam                                           | 1:100            |
| ITGAV / clone 21   | Mouse IgG <sub>1</sub> | BD Biosciences, Oxford, UK                      | 1:500            |
| Keratin 8 / M20    | Mouse IgG <sub>1</sub> | Abcam,                                          | 1:100            |
| Keratin 14 / LL002 | Mouse IgG <sub>3</sub> | Serotec, Oxford, UK                             | 1:100/1:50 (LCM) |
| SNAP25             | Rabbit IgG             | Lab Vision Ltd, Suffolk, UK                     | 1:200            |
| Sprouty 1 / H-120  | Rabbit IgG             | Santa Cruz, Insight<br>Biotechnology, Middx, UK | 1:50             |
| TEAD1 / Clone 31   | Mouse IgG <sub>1</sub> | BD Biosciences                                  | 1:200            |

#### Secondary antibodies

Primary antibodies were detected with FITC- or TRITC- conjugated goat anti-mouse or rabbit secondary antibodies (Southern Biotechnology, Cambridge Biosciences, Cambridge, UK) at 1:100 dilution. For double staining, two primary antibodies were simultaneously applied and detected using different immunoglobulin isotype specific antibodies.
