# Supplementary material for: TEAD1 and c-Cbl are novel prostate basal cell markers that correlate with poor clinical outcome in prostate cancer
Source: PubMed Central journal article supplement (PMC2600693; doi:10.1038/sj.bjc.6604774), 2008-11-11
Supplement: 6604774x3.pdf [file 6604774x3.pdf]

**Online only****Supplementary Table S2b: All genes up-regulated in luminal cells (ratio to basal cell expression)**

| Rank | Symbol   | Name                                                  | Ratio | p-value | Clone ID | LLID   |
|------|----------|-------------------------------------------------------|-------|---------|----------|--------|
| 1    | RPS11    | Ribosomal protein S11                                 | 6.656 | 0.0057  | 172243   | 6205   |
| 2    | VPS4B    | Vacuolar protein sorting 4 homolog B                  | 5.314 | 0.0186  | 150632   | 9525   |
| 3    | VDAC3    | Voltage-dependent anion channel 3                     | 4.835 | 0.0360  | 796759   | 7419   |
| 4    | SNAP25   | Synaptosomal-associated protein, 25kDa                | 4.340 | 0.0050  | 969877   | 6616   |
| 5    | PPP3CA   | Protein phosphatase 3 catalytic subunit, alpha        | 4.260 | 0.0145  | 431296   | 5530   |
| 6    | LRBA     | LPS-responsive vesicle trafficking                    | 4.254 | 0.0232  | 758404   | 987    |
| 7    | ALDH9A1  | Aldehyde dehydrogenase 9 family, A1                   | 4.064 | 0.0159  | 36387    | 223    |
| 8    | PDE6D    | Phosphodiesterase 6D, cGMP-specific, rod, delta       | 3.944 | 0.0340  | 753199   | 5147   |
| 9    | NBL1     | Neuroblastoma, suppression of tumorigenicity 1        | 3.556 | 0.0162  | 365534   | 4681   |
| 10   | FBP1     | Fructose-1,6-bisphosphatase 1                         | 3.486 | 0.0394  | 433253   | 2203   |
| 11   | C7       | Complement component 7                                | 3.463 | 0.0067  | 757712   | 730    |
| 12   | IPO11    | Importin 11                                           | 3.440 | 0.0414  | 127826   | 51194  |
| 13   | COL1A2   | Collagen, type I, alpha 2                             | 3.406 | 0.0221  | 271448   | 1278   |
| 14   | NFASC    | Neurofascin homolog (chicken)                         | 3.350 | 0.0211  | 967492   | 23114  |
| 15   | PFKM     | Phosphofructokinase, muscle                           | 3.291 | 0.0260  | 489626   | 5213   |
| 16   | KBTBD11  | Kelch repeat and BTB (POZ) domain cont 11             | 3.274 | 0.0164  | 384088   | 9920   |
| 17   | PTHRI    | Parathyroid hormone receptor 1                        | 3.262 | 0.0334  | 1323328  | 5745   |
| 18   | C1orf128 | Chromosome 1 open reading frame 128                   | 3.246 | 0.0408  | 175027   | 57095  |
| 19   | ABLIM1   | Actin binding LIM protein 1                           | 3.238 | 0.0014  | 220294   | 3983   |
| 20   | C1ORF14  | Chromosome 1 open reading frame 14                    | 3.212 | 0.0132  | 1409913  | 81626  |
| 21   | SLC3A2   | Solute carrier family 3, member 2                     | 3.208 | 0.0292  | 150647   | 6520   |
| 22   | COX6B1   | Cytochrome c oxidase subunit Vib polypeptide 1        | 3.024 | 0.0018  | 172748   | 1340   |
| 23   | NNMT     | Nicotinamide N-methyltransferase                      | 3.009 | 0.0467  | 85840    | 4837   |
| 24   | GCH1     | GTP cyclohydrolase 1 (dopa-responsive dystonia)       | 2.939 | 0.0088  | 783849   | 2643   |
| 25   | HRASLS3  | HRAS-like suppressor 3                                | 2.935 | 0.0268  | 785293   | 11145  |
| 26   | CAPZA1   | Capping protein muscle Z-line, alpha 1                | 2.871 | 0.0364  | 785793   | 829    |
| 27   | LRRRC23  | Leucine rich repeat containing 23                     | 2.855 | 0.0066  | 302632   | 10233  |
| 28   | TPI1     | Triosephosphate isomerase 1                           | 2.847 | 0.0311  | 855749   | 7167   |
| 29   | MRCL3    | Myosin regulatory light chain MRCL3                   | 2.845 | 0.0093  | 296841   | 10627  |
| 30   | C2ORF25  | Chromosome 2 open reading frame 25                    | 2.822 | 0.0085  | 207324   | 27249  |
| 31   | CD47     | CD47 molecule                                         | 2.781 | 0.0419  | 811819   | 961    |
| 32   | GABBR1   | Gamma-aminobutyric acid (GABA) B receptor, 1          | 2.756 | 0.0240  | 298231   | 2550   |
| 33   | ENO1     | Enolase 1, (alpha)                                    | 2.744 | 0.0227  | 723879   | 2023   |
| 34   | GLG1     | Golgi apparatus protein 1                             | 2.738 | 0.0009  | 229579   | 2734   |
| 35   | APOD     | Apolipoprotein D                                      | 2.706 | 0.0265  | 159608   | 347    |
| 36   | ENO2     | Enolase 2 (gamma, neuronal)                           | 2.682 | 0.0265  | 789147   | 2026   |
| 37   | CDIPT    | CDP-diacylglycerol-inositol 3-phosphatidyltransferase | 2.680 | 0.0125  | 769901   | 10423  |
| 38   | NDRG1    | N-myc downstream regulated gene 1                     | 2.649 | 0.0011  | 842863   | 10397  |
| 39   | ALS2CR2  | Amyotrophic lateral sclerosis 2 chromosome region     | 2.645 | 0.0195  | 730342   | 55437  |
| 40   | TCEAL6   | Transcription elongation factor A (SII)-like 6        | 2.582 | 0.0146  | 2350376  | 158931 |
| 41   | CAMKK2   | Calcium/calmodulin-dep protein kinase kinase 2b       | 2.558 | 0.0357  | 209075   | 10645  |
| 42   | FLJ23577 | KPL2 protein                                          | 2.550 | 0.0027  | 1893348  | 79925  |
| 43   | RPL24    | Ribosomal protein L24                                 | 2.546 | 0.0267  | 795247   | 6152   |

|    |           |                                                                            |       |        |         |        |
|----|-----------|----------------------------------------------------------------------------|-------|--------|---------|--------|
| 44 | SEC23IP   | SEC23 interacting protein                                                  | 2.544 | 0.0135 | 229464  | 11196  |
| 45 | B2M       | Beta-2-microglobulin                                                       | 2.536 | 0.0368 | 141782  | 567    |
| 46 | NKG7      | Natural killer cell group 7 sequence                                       | 2.515 | 0.0098 | 71606   | 4818   |
| 47 | MYH10     | Myosin, heavy chain 10, non-muscle                                         | 2.494 | 0.0356 | 823886  | 4628   |
| 48 | APLP2     | Amyloid beta (A4) precursor-like protein 2                                 | 2.489 | 0.0408 | 366625  | 334    |
| 49 | RRAGA     | Ras-related GTP binding A                                                  | 2.485 | 0.0040 | 34660   | 10670  |
| 50 | ASTE1     | Asteroid homolog 1 (Drosophila)                                            | 2.484 | 0.0452 | 768957  | 28990  |
| 51 | CUL3      | Cullin 3                                                                   | 2.483 | 0.0380 | 126815  | 8452   |
| 52 | ARFGAP3   | ADP-ribosylation factor GTPase activating protein 3                        | 2.469 | 0.0191 | 259054  | 26286  |
| 53 | SERPINE2  | Serpin peptidase inhibitor, clade E member 2                               | 2.449 | 0.0014 | 246722  | 5270   |
| 54 | MGC99813  | Similar to RIKEN cDNA A230078I05 gene                                      | 2.439 | 0.0140 | 124341  | 130612 |
| 55 | NOL6      | Nucleolar protein family 6 (RNA-associated)                                | 2.439 | 0.0058 | 724138  | 65083  |
| 56 | NYD-SP18  | Family with sequence similarity 137, member A                              | 2.408 | 0.0055 | 1638806 | 84691  |
| 57 | ANAPC13   | Anaphase promoting complex subunit 13                                      | 2.403 | 0.0132 | 502556  | 25847  |
| 58 | ABLIM1    | Actin binding LIM protein 1                                                | 2.386 | 0.0419 | 753692  | 3983   |
| 59 | FLJ22318  | Required for meiotic nuclear division 5 homolog B ( <i>S. cerevisiae</i> ) | 2.344 | 0.0211 | 767827  | 64777  |
| 60 | CKLFSF4   | CKLF-like MARVEL transmembrane domain containing 4                         | 2.335 | 0.0017 | 279411  | 146223 |
| 61 | BAZ1B     | Bromodomain adjacent to zinc finger domain, 1B                             | 2.331 | 0.0232 | 366041  | 9031   |
| 62 | KLHL5     | Kelch-like 5 (Drosophila)                                                  | 2.328 | 0.0123 | 704793  | 51088  |
| 63 | DSCR2     | Down syndrome critical region gene 2                                       | 2.323 | 0.0090 | 377539  | 8624   |
| 64 | MYLK      | Myosin, light chain kinase                                                 | 2.320 | 0.0428 | 841308  | 4638   |
| 66 | SLC24A1   | Solute carrier family 24 (sodium/potassium/calcium exchanger)              | 2.308 | 0.0101 | 360741  | 9187   |
| 67 | VPS35     | Vacuolar protein sorting 35 homolog ( <i>S. cerevisiae</i> )               | 2.303 | 0.0353 | 281010  | 55737  |
| 68 | SPTBN1    | Spectrin, beta, non-erythrocytic 1                                         | 2.303 | 0.0369 | 276621  | 6711   |
| 69 | AMFR      | Autocrine motility factor receptor                                         | 2.301 | 0.0039 | 753897  | 267    |
| 70 | H2AFV     | H2A histone family, member V                                               | 2.300 | 0.0204 | 121452  | 94239  |
| 71 | TLE2      | Transducin-like enhancer of split 2 (E(sp1) homolog, Drosophila)           | 2.293 | 0.0147 | 1473131 | 7089   |
| 72 | MAP3K7IP2 | Mitogen-activated protein kinase kinase kinase 7 int prot 2                | 2.281 | 0.0249 | 1568205 | 23118  |
| 73 | GA17      | Eukaryotic translation initiation factor 3, subunit M                      | 2.280 | 0.0204 | 124733  | 10480  |
| 74 | UGP2      | UDP-glucose pyrophosphorylase 2                                            | 2.274 | 0.0241 | 486436  | 7360   |
| 75 | FGFR2     | Fibroblast growth factor receptor 2                                        | 2.273 | 0.0097 | 26871   | 2263   |
| 76 | CDKN1B    | Cyclin-dependent kinase inhibitor 1B (p27, Kip1)                           | 2.266 | 0.0236 | 854668  | 1027   |
| 77 | SDHC      | Succinate dehydrogenase complex, subunit C,                                | 2.262 | 0.0026 | 366132  | 6391   |
| 78 | SELT      | Selenoprotein T                                                            | 2.258 | 0.0022 | 728216  | 51714  |
| 79 | IL17RC    | Interleukin 17 receptor C                                                  | 2.256 | 0.0494 | 755424  | 84818  |
| 80 | DECR1     | 2,4-dienoyl CoA reductase 1, mitochondrial                                 | 2.254 | 0.0464 | 320618  | 1666   |
| 81 | TUBE1     | Tubulin, epsilon 1                                                         | 2.253 | 0.0220 | 489765  | 51175  |
| 82 | COPS6     | COP9 constitutive photomorphogenic homolog subunit 6                       | 2.242 | 0.0078 | 208431  | 10980  |
| 83 | KIAA0376  | SPECC1-like                                                                | 2.237 | 0.0269 | 32472   | 23384  |
| 84 | WDR26     | WD repeat domain 26                                                        | 2.234 | 0.0025 | 268250  | 80232  |
| 85 | EIF4G1    | Eukaryotic translation initiation factor 4 gamma, 1                        | 2.209 | 0.0213 | 25988   | 1981   |
| 86 | COQ6      | Coenzyme Q6 homolog, monooxygenase ( <i>S. cerevisiae</i> )                | 2.198 | 0.0229 | 84880   | 51004  |
| 87 | C4A       | Complement component 4B (Chido blood group)                                | 2.192 | 0.0078 | 26063   | 721    |
| 88 | RANBP6    | RAN binding protein 6                                                      | 2.192 | 0.0123 | 43819   | 26953  |
| 89 | OSBPL10   | Oxysterol binding protein-like 10                                          | 2.185 | 0.0084 | 151597  | 114884 |
| 90 | CIB1      | Calcium and integrin binding 1 (calmyrin)                                  | 2.175 | 0.0165 | 841679  | 10519  |
| 91 | SGTA      | Small glutamine-rich tetratricopeptide repeat-containing, alpha            | 2.165 | 0.0374 | 174620  | 6449   |
| 92 | SVIP      | Small VCP/p97-interacting protein                                          | 2.157 | 0.0403 | 768573  | 258010 |
| 93 | SIAT7A    | ST6 -N-acetylgalactosaminide alpha-2,6-sialyltransferase 1                 | 2.148 | 0.0258 | 1391774 | 55808  |
| 94 | MGC10854  | Trichoplein, keratin filament binding                                      | 2.144 | 0.0056 | 1534055 | 84260  |
| 95 | PHB       | Prohibitin                                                                 | 2.143 | 0.0270 | 357448  | 5245   |

|     |           |                                                              |       |        |         |        |
|-----|-----------|--------------------------------------------------------------|-------|--------|---------|--------|
| 96  | LTA4H     | Leukotriene A4 hydrolase                                     | 2.140 | 0.0222 | 814095  | 4048   |
| 97  | ATP5I     | ATP synthase, mitochondrial F0 complex, subunit E            | 2.139 | 0.0467 | 782439  | 521    |
| 98  | TPPP      | Tubulin polymerization promoting protein                     | 2.136 | 0.0452 | 172895  | 11076  |
| 99  | DCN       | Decorin                                                      | 2.133 | 0.0254 | 1643268 | 1634   |
| 100 | BLP1      | TM2 domain containing 2                                      | 2.132 | 0.0394 | 42822   | 83877  |
| 101 | COX11P    | COX11 homolog, cytochrome c oxidase assembly protein (yeast) | 2.121 | 0.0394 | 28259   | 1353   |
| 102 | MAL       | Mal, T-cell differentiation protein                          | 2.118 | 0.0287 | 31154   | 4118   |
| 103 | POLR2G    | Polymerase (RNA) II (DNA directed) polypeptide G             | 2.109 | 0.0199 | 219635  | 5436   |
| 104 | SND1      | Staphylococcal nuclease and tudor domain containing 1        | 2.109 | 0.0429 | 361048  | 27044  |
| 105 | PTP4A1    | Protein tyrosine phosphatase type IVA, member 1              | 2.108 | 0.0135 | 26097   | 7803   |
| 106 | MRLC2     | Myosin regulatory light chain MRLC2                          | 2.102 | 0.0013 | 841498  | 103910 |
| 107 | CAPNS1    | Calpain, small subunit 1                                     | 2.091 | 0.0409 | 174796  | 826    |
| 108 | SERP1     | Stress-associated endoplasmic reticulum protein 1            | 2.082 | 0.0328 | 302955  | 27230  |
| 109 | SHFM1     | Split hand/foot malformation (ectrodactyly) type 1           | 2.075 | 0.0156 | 346613  | 7979   |
| 110 | LOC653354 | Similar to amrpadillo repeat containing, X-linked 6-like     | 2.069 | 0.0359 | 811064  | 653354 |
| 111 | DDX3Y     | DEAD (Asp-Glu-Ala-Asp) box polypeptide 3, Y-linked           | 2.068 | 0.0125 | 782679  | 8653   |
| 112 | SCNN1A    | Sodium channel, nonvoltage-gated 1 alpha                     | 2.053 | 0.0058 | 810873  | 6337   |
| 113 | CDKN1A    | Cyclin-dependent kinase inhibitor 1A (p21, Cip1)             | 2.048 | 0.0207 | 166273  | 1026   |
| 114 | C2ORF29   | Chromosome 2 open reading frame 29                           | 2.046 | 0.0486 | 146133  | 55571  |
| 115 | FRG1      | FSHD region gene 1                                           | 2.034 | 0.0353 | 795919  | 2483   |
| 116 | SPRYD4    | SPRY domain containing 4                                     | 2.022 | 0.0442 | 120750  | 283377 |
| 117 | PRKCI     | Protein kinase C, iota                                       | 2.020 | 0.0252 | 1882357 | 5584   |
| 118 | NUMA1     | Nuclear mitotic apparatus protein 1                          | 2.018 | 0.0421 | 154568  | 4926   |
| 119 | ECHDC2    | Enoyl Coenzyme A hydratase domain containing 2               | 2.007 | 0.0010 | 198208  | 55268  |
| 120 | SPRY1     | Sprouty homolog 1, antagonist of FGF signaling               | 2.003 | 0.0150 | 377468  | 10252  |
| 121 | KLF11     | Kruppel-like factor 11                                       | 1.982 | 0.0096 | 110959  | 8462   |
| 122 | KIAA0152  | KIAA0152                                                     | 1.980 | 0.0134 | 111653  | 9761   |
| 123 | EIF3S9    | Eukaryotic translation initiation factor 3, subunit B        | 1.972 | 0.0030 | 768052  | 8662   |
| 124 | HSPA1L    | Heat shock 70kDa protein 1-like                              | 1.961 | 0.0455 | 35091   | 3305   |
| 125 | PELI1     | Pellino homolog 1 (Drosophila)                               | 1.958 | 0.0259 | 344442  | 57162  |
| 126 | RAB6IP1   | RAB6 interacting protein 1                                   | 1.957 | 0.0360 | 364434  | 23258  |
| 127 | MSN       | Moesin                                                       | 1.950 | 0.0004 | 131362  | 4478   |
| 128 | CRSP7     | Mediator complex subunit 26                                  | 1.946 | 0.0132 | 276714  | 9441   |
| 129 | ATRN      | Attractin                                                    | 1.941 | 0.0016 | 40539   | 8455   |
| 131 | SATB1     | SATB homeobox 1                                              | 1.939 | 0.0236 | 1556983 | 6304   |
| 132 | PTPRU     | Protein tyrosine phosphatase, receptor type, U               | 1.915 | 0.0244 | 744800  | 10076  |
| 133 | BNC2      | Basonuclin 2                                                 | 1.913 | 0.0256 | 269733  | 54796  |
| 134 | IQGAP2    | IQ motif containing GTPase activating protein 2              | 1.903 | 0.0356 | 321386  | 10788  |
| 135 | MICAL3    | Microtubule associated monooxygenase                         | 1.902 | 0.0318 | 201056  | 57553  |
| 136 | NRN1      | Neuritin 1                                                   | 1.902 | 0.0257 | 38531   | 51299  |
| 137 | SNRK      | SNF related kinase                                           | 1.902 | 0.0287 | 342720  | 54861  |
| 138 | KPNA6     | Karyopherin alpha 6 (importin alpha 7)                       | 1.898 | 0.0068 | 151012  | 23633  |
| 139 | ARHN      | Rho family GTPase 2                                          | 1.890 | 0.0285 | 757139  | 8153   |
| 140 | BBOX1     | Butyrobetaine (gamma), 2-oxoglutarate dioxygenase 1          | 1.889 | 0.0211 | 34218   | 8424   |
| 141 | DLEU2     | Deleted in lymphocytic leukemia, 2                           | 1.882 | 0.0290 | 296248  | 8847   |
| 142 | GNPAT     | Glyceronephosphate O-acyltransferase                         | 1.882 | 0.0319 | 841287  | 8443   |
| 143 | VIPR1     | Vasoactive intestinal peptide receptor 1                     | 1.880 | 0.0109 | 110090  | 7433   |
| 144 | DSG2      | Desmoglein 2                                                 | 1.879 | 0.0323 | 842971  | 1829   |
| 145 | SYK       | Spleen tyrosine kinase                                       | 1.876 | 0.0241 | 897822  | 6850   |
| 146 | TRIP4     | Thyroid hormone receptor interactor 4                        | 1.871 | 0.0290 | 785334  | 9325   |
| 147 | ZNFN1A5   | IKAROS family zinc finger 5 (Pegasus)                        | 1.870 | 0.0081 | 128274  | 64376  |

|     |           |                                                                     |       |        |         |        |
|-----|-----------|---------------------------------------------------------------------|-------|--------|---------|--------|
| 148 | ARL10C    | ADP-ribosylation factor-like 8B                                     | 1.869 | 0.0286 | 39677   | 55207  |
| 149 | ANXA5     | Annexin A5                                                          | 1.862 | 0.0236 | 786680  | 308    |
| 150 | AVEN      | Apoptosis, caspase activation inhibitor                             | 1.856 | 0.0048 | 377368  | 57099  |
| 151 | THRAP1    | Mediator complex subunit 13                                         | 1.854 | 0.0296 | 136451  | 9969   |
| 152 | TDG       | Thymine-DNA glycosylase                                             | 1.843 | 0.0223 | 823614  | 6996   |
| 153 | PDLIM1    | PDZ and LIM domain 1 (elfin)                                        | 1.827 | 0.0277 | 298984  | 9124   |
| 154 | HNRPU     | Heterogeneous nuclear ribonucleoprotein U                           | 1.819 | 0.0128 | 22694   | 3192   |
| 155 | SHMT1     | Serine hydroxymethyltransferase 1 (soluble)                         | 1.811 | 0.0302 | 39798   | 6470   |
| 156 | POLDIP3   | Polymerase (DNA-directed), delta interacting protein 3              | 1.810 | 0.0307 | 35383   | 84271  |
| 157 | MGC15882  | Chromosome 1 open reading frame 94                                  | 1.805 | 0.0260 | 1525744 | 84970  |
| 158 | MGC33510  | Alcohol dehydrogenase, iron containing, 1                           | 1.802 | 0.0215 | 41398   | 137872 |
| 159 | FHL2      | Four and a half LIM domains 2                                       | 1.796 | 0.0421 | 324636  | 2274   |
| 160 | ZCCHC14   | Zinc finger, CCHC domain containing 14                              | 1.794 | 0.0436 | 310703  | 23174  |
| 161 | CADPS     | Ca <sup>2+</sup> -dependent secretion activator                     | 1.794 | 0.0066 | 39794   | 8618   |
| 162 | TXNL4A    | Thioredoxin-like 4A                                                 | 1.793 | 0.0373 | 323317  | 10907  |
| 163 | KCNH2     | Potassium voltage-gated channel, subfamily H (eag-related)          | 1.790 | 0.0156 | 125570  | 3757   |
| 164 | PLA2R1    | Phospholipase A2 receptor 1, 180kDa                                 | 1.788 | 0.0129 | 114764  | 22925  |
| 165 | SIAT4A    | Hypothetical protein LOC286167                                      | 1.786 | 0.0334 | 293391  | 286167 |
| 166 | N-PAC     | Cytokine-like nuclear factor n-pac                                  | 1.785 | 0.0158 | 343629  | 84656  |
| 167 | SMARCA4   | SWI/SNF related, actin dependent regulator of chromatin,            | 1.783 | 0.0292 | 173169  | 6597   |
| 168 | WAC       | WW domain containing adaptor with coiled-coil                       | 1.781 | 0.0237 | 21790   | 51322  |
| 169 | OSTM1     | Osteopetrosis associated transmembrane protein 1                    | 1.772 | 0.0348 | 30038   | 28962  |
| 170 | LOC728974 | Similar to peptidylprolyl isomerase A isoform 1                     | 1.768 | 0.0043 | 241900  | 728974 |
| 171 | XTP2      | BAT2 domain containing 1                                            | 1.760 | 0.0222 | 123408  | 23215  |
| 172 | PTGES     | Prostaglandin E synthase                                            | 1.749 | 0.0126 | 754378  | 9536   |
| 173 | KIAA0232  | KIAA0232                                                            | 1.746 | 0.0451 | 278663  | 9778   |
| 174 | C3orf59   | Chromosome 3 open reading frame 59                                  | 1.738 | 0.0045 | 33196   | 151963 |
| 175 | THSD1P    | Thrombospondin, type I, domain containing 1 pseudogene              | 1.735 | 0.0056 | 108374  | 374500 |
| 176 | EIF4ENIF1 | Eukaryotic translation initiation factor 4E nuclear import factor 1 | 1.735 | 0.0425 | 1393138 | 56478  |
| 177 | PSME1     | Proteasome (prosome, macropain) activator subunit 1                 | 1.733 | 0.0054 | 25849   | 5720   |
| 178 | MYO9A     | Myosin IXA                                                          | 1.733 | 0.0164 | 727977  | 4649   |
| 179 | PPP1R12B  | Protein phosphatase 1, regulatory (inhibitor) subunit 12B           | 1.724 | 0.0426 | 307174  | 4660   |
| 180 | A2M       | Hypothetical protein LOC144571                                      | 1.724 | 0.0137 | 25715   | 144571 |
| 181 | ARL2BP    | ADP-ribosylation factor-like 2 binding protein                      | 1.720 | 0.0335 | 37264   | 23568  |
| 182 | PPP1R9A   | Protein phosphatase 1, regulatory (inhibitor) subunit 9A            | 1.711 | 0.0343 | 942306  | 55607  |
| 183 | P29       | SYF2 homolog, RNA splicing factor ( <i>S. cerevisiae</i> )          | 1.709 | 0.0417 | 49546   | 25949  |
| 184 | SURF4     | Surfeit 4                                                           | 1.708 | 0.0290 | 109423  | 6836   |
| 185 | PRRX1     | Paired related homeobox 1                                           | 1.708 | 0.0070 | 364554  | 5396   |
| 186 | PPP1R15B  | Protein phosphatase 1, regulatory (inhibitor) subunit 15B           | 1.705 | 0.0309 | 814834  | 84919  |
| 187 | API5      | Apoptosis inhibitor 5                                               | 1.699 | 0.0315 | 471597  | 8539   |
| 188 | HIST1H4C  | Histone cluster 1, H4c                                              | 1.699 | 0.0160 | 1461138 | 8364   |
| 189 | PSG7      | Pregnancy specific beta-1-glycoprotein 7                            | 1.697 | 0.0299 | 292935  | 5676   |
| 190 | SCAP      | SREBF chaperone                                                     | 1.696 | 0.0396 | 22109   | 22937  |
| 191 | HNRPUL1   | Heterogeneous nuclear ribonucleoprotein U-like 1                    | 1.693 | 0.0486 | 810395  | 11100  |
| 192 | UBE2B     | Ubiquitin-conjugating enzyme E2B (RAD6 homolog)                     | 1.687 | 0.0189 | 898138  | 7320   |
| 193 | MTRF1     | Mitochondrial translational release factor 1                        | 1.686 | 0.0341 | 823638  | 9617   |
| 194 | RNF167    | Ring finger protein 167                                             | 1.679 | 0.0355 | 307964  | 26001  |
| 195 | RNF144    | Ring finger protein 144A                                            | 1.677 | 0.0054 | 33573   | 9781   |
| 196 | MGAM      | Maltase-glucoamylase (alpha-glucosidase)                            | 1.676 | 0.0388 | 1502206 | 8972   |
| 197 | ATP6V1F   | ATPase, H <sup>+</sup> transporting, lysosomal 14kDa, V1 subunit F  | 1.664 | 0.0462 | 126278  | 9296   |
| 198 | PLCB1     | Phospholipase C, beta 1 (phosphoinositide-specific)                 | 1.664 | 0.0075 | 360865  | 23236  |

|     |           |                                                                 |       |        |         |        |
|-----|-----------|-----------------------------------------------------------------|-------|--------|---------|--------|
| 199 | PRM2      | Protamine 2                                                     | 1.663 | 0.0051 | 1600243 | 5620   |
| 200 | ABAT      | 4-aminobutyrate aminotransferase                                | 1.660 | 0.0139 | 171774  | 18     |
| 201 | SCAMP2    | Secretory carrier membrane protein 2                            | 1.655 | 0.0181 | 769846  | 10066  |
| 202 | ASAH1     | N-acylsphingosine amidohydrolase (acid ceramidase)-like         | 1.648 | 0.0085 | 1682030 | 27163  |
| 203 | NCDN      | Neurochondrin                                                   | 1.643 | 0.0153 | 27521   | 23154  |
| 204 | MTHFR     | Chromosome 1 open reading frame 167                             | 1.640 | 0.0385 | 1894346 | 284498 |
| 205 | SOX6      | Chromosome 11 open reading frame 58                             | 1.633 | 0.0041 | 205464  | 10944  |
| 206 | KIAA0415  | Forkhead box K1                                                 | 1.630 | 0.0210 | 756419  | 221937 |
| 207 | RHOG      | Ras homolog gene family, member G (rho G)                       | 1.626 | 0.0385 | 39541   | 391    |
| 208 | ATP11B    | ATPase, Class VI, type 11B                                      | 1.625 | 0.0281 | 199286  | 23200  |
| 210 | RDBP      | RD RNA binding protein                                          | 1.623 | 0.0016 | 509484  | 7936   |
| 211 | SEC23B    | Sec23 homolog B ( <i>S. cerevisiae</i> )                        | 1.618 | 0.0190 | 743804  | 10483  |
| 212 | MARCH11   | Membrane-associated ring finger (C3HC4) 11                      | 1.615 | 0.0466 | 1883888 | 441061 |
| 213 | MGC14327  | Hypothetical protein MGC14327                                   | 1.613 | 0.0372 | 277570  | 94107  |
| 214 | DC12      | Chromosome 3 open reading frame 37                              | 1.613 | 0.0333 | 40233   | 56941  |
| 215 | ZC3HAV1   | Zinc finger CCCH-type, antiviral 1                              | 1.612 | 0.0398 | 200187  | 56829  |
| 216 | PSD2      | Pleckstrin and Sec7 domain containing 2                         | 1.610 | 0.0079 | 38794   | 84249  |
| 217 | OXCT1     | 3-oxoacid CoA transferase 1                                     | 1.605 | 0.0170 | 28469   | 5019   |
| 218 | TCERG1    | Transcribed locus                                               | 1.602 | 0.0472 | 1251292 | 2      |
| 219 | TMEM31    | Transmembrane protein 31                                        | 1.597 | 0.0035 | 742547  | 203562 |
| 220 | CESK1     | Chaperonin containing TCP1, subunit 8 (theta)-like 2            | 1.597 | 0.0283 | 1586695 | 150160 |
| 221 | PPM2C     | Protein phosphatase 2C, magnesium-dependent, catalytic subunit  | 1.591 | 0.0194 | 174304  | 54704  |
| 222 | TSPAN2    | Tetraspanin 2                                                   | 1.590 | 0.0239 | 486605  | 10100  |
| 223 | HIVEP1    | Human immunodeficiency virus type I enhancer binding protein 1  | 1.589 | 0.0178 | 267094  | 3096   |
| 224 | PPP1R11   | Protein phosphatase 1, regulatory (inhibitor) subunit 11        | 1.588 | 0.0455 | 810986  | 6992   |
| 225 | SNRPC     | Small nuclear ribonucleoprotein polypeptide C                   | 1.583 | 0.0491 | 724387  | 6631   |
| 226 | CCNK      | Cyclin K                                                        | 1.581 | 0.0173 | 1686512 | 8812   |
| 227 | BRD8      | Bromodomain containing 8                                        | 1.574 | 0.0284 | 815287  | 10902  |
| 228 | CDC14A    | CDC14 cell division cycle 14 homolog A ( <i>S. cerevisiae</i> ) | 1.568 | 0.0128 | 293403  | 8556   |
| 229 | EML1      | Echinoderm microtubule associated protein like 1                | 1.557 | 0.0137 | 25163   | 2009   |
| 230 | HT007     | Transmembrane protein 126B                                      | 1.555 | 0.0257 | 269998  | 55863  |
| 231 | LOC723809 | LOC723809                                                       | 1.555 | 0.0294 | 2383496 | 723809 |
| 232 | KIAA0310  | SEC16 homolog A ( <i>S. cerevisiae</i> )                        | 1.553 | 0.0180 | 809944  | 9919   |
| 233 | C13orf15  | Chromosome 13 open reading frame 15                             | 1.551 | 0.0056 | 1520384 | 28984  |
| 234 | AKT3      | V-akt murine thymoma viral oncogene homolog 3                   | 1.550 | 0.0196 | 34539   | 10000  |
| 235 | ITGB3BP   | Integrin beta 3 binding protein (beta3-endonexin)               | 1.549 | 0.0029 | 298020  | 23421  |
| 236 | EWSR1     | Ewing sarcoma breakpoint region 1                               | 1.543 | 0.0473 | 108304  | 2130   |
| 237 | FLJ32942  | Family with sequence similarity 112, member B                   | 1.542 | 0.0408 | 109045  | 121355 |
| 238 | TPX2      | TPX2, microtubule-associated, homolog ( <i>Xenopus laevis</i> ) | 1.534 | 0.0272 | 232837  | 22974  |
| 239 | KIAA0056  | Non-SMC condensin II complex, subunit D3                        | 1.533 | 0.0312 | 770066  | 23310  |
| 240 | PCGF5     | Polycomb group ring finger 5                                    | 1.533 | 0.0474 | 2009704 | 84333  |
| 241 | RAB9P40   | Rab9 effector protein with kelch motifs                         | 1.527 | 0.0083 | 173344  | 10244  |
| 242 | HDHD2     | Haloacid dehalogenase-like hydrolase domain containing 2        | 1.527 | 0.0251 | 28643   | 84064  |
| 243 | PDK1      | Pyruvate dehydrogenase kinase, isozyme 1                        | 1.522 | 0.0485 | 1645668 | 5163   |
| 244 | NPAS2     | Transcribed locus                                               | 1.522 | 0.0364 | 147776  | 147776 |
| 245 | ADAMTSL1  | ADAMTS-like 1                                                   | 1.520 | 0.0263 | 752797  | 92949  |
| 246 | ZNF228    | Zinc finger protein 228                                         | 1.516 | 0.0419 | 322683  | 7771   |
| 247 | ADAMTS17  | ADAM metalloproteinase with thrombospondin type 1 motif, 17     | 1.513 | 0.0179 | 364454  | 170691 |
| 248 | IVL       | Involucrin                                                      | 1.509 | 0.0194 | 2449565 | 3713   |
| 249 | NT5DC3    | 5'-nucleotidase domain containing 3                             | 1.508 | 0.0262 | 41892   | 51559  |

|     |           |                                                                |       |        |         |        |
|-----|-----------|----------------------------------------------------------------|-------|--------|---------|--------|
| 250 | SLC6A1    | Solute carrier family 6 (neurotransmitter transporter, GABA),1 | 1.503 | 0.0270 | 172250  | 6529   |
| 251 | PLA2G12B  | Phospholipase A2, group XIIB                                   | 1.502 | 0.0270 | 297107  | 84647  |
| 252 | RNASEL    | Ribonuclease L (2',5'-oligoadenylate synthetase-dependent)     | 1.500 | 0.0216 | 321167  | 6041   |
| 253 | RTN4      | Reticulon 4                                                    | 1.497 | 0.0287 | 38934   | 57142  |
| 254 | RANBP3    | RAN binding protein 3                                          | 1.496 | 0.0466 | 490045  | 8498   |
| 255 | XAB2      | XPA binding protein 2                                          | 1.494 | 0.0478 | 28448   | 56949  |
| 256 | TUBA1     | Tubulin, alpha 4a                                              | 1.492 | 0.0363 | 34579   | 7277   |
| 257 | TOLLIP    | Toll interacting protein                                       | 1.489 | 0.0449 | 768500  | 54472  |
| 258 | GPR19     | G protein-coupled receptor 19                                  | 1.488 | 0.0388 | 45231   | 2842   |
| 259 | SEC3L1    | Exocyst complex component 1                                    | 1.486 | 0.0408 | 1251877 | 55763  |
| 260 | FHL5      | Four and a half LIM domains 5                                  | 1.482 | 0.0304 | 1409893 | 9457   |
| 261 | SFRS11    | Splicing factor, arginine/serine-rich 11                       | 1.478 | 0.0171 | 1390404 | 9295   |
| 262 | PABPC5    | Poly(A) binding protein, cytoplasmic 5                         | 1.470 | 0.0407 | 878759  | 140886 |
| 263 | PLN       | Phospholamban                                                  | 1.468 | 0.0226 | 773771  | 5350   |
| 264 | UREB1     | HECT, UBA and WWE domain containing 1                          | 1.460 | 0.0437 | 297011  | 10075  |
| 265 | ATAD1     | ATPase family, AAA domain containing 1                         | 1.459 | 0.0151 | 26005   | 84896  |
| 266 | CSPG3     | Neurocan                                                       | 1.427 | 0.0413 | 41261   | 1463   |
| 267 | LOC644339 | Similar to ankyrin repeat domain 20A                           | 1.423 | 0.0391 | 134742  | 644339 |
