# Supplementary material for: TEAD1 and c-Cbl are novel prostate basal cell markers that correlate with poor clinical outcome in prostate cancer
Source: PubMed Central journal article supplement (PMC2600693; doi:10.1038/sj.bjc.6604774), 2008-11-11
Supplement: 6604774x5.pdf [file 6604774x5.pdf]

**Online Only**

**Supplementary Table 4**

**Primer Sequences**

| <b>Product name</b> | <b>Forward primer</b> | <b>Reverse primer</b> | <b>Product Size (bp)</b> |
|---------------------|-----------------------|-----------------------|--------------------------|
| ITGAV               | AGGCAGATGGCAAAGGAGTA  | TGCTCCCTTTTGCTTGAGTT  | 83                       |
| CBL                 | GGGGTCACTGTTTCATCACT  | TGTTTGGGACCATAAACACA  | 75                       |
| TEAD1               | TTCCACCAAAGTTTGCTCCT  | GCCATTCTCAAACCTGCAT   | 76                       |
| SNAP25              | CTGCTCGTGTAGTGGACGAA  | ATTTTCTCGGGCATCATTTG  | 83                       |
| GAPDH               | GGGAAGCTTGTCATCAATGG  | TTGATTTTGAGGGATCTCG   | 65                       |
